# Supplementary material for: Microbial Diversity Analysis and Genome Sequencing Identify Xanthomonas perforans as the Pathogen of Bacterial Leaf Canker of Water Spinach (Ipomoea aquatic)
Source: Front Microbiol. 2021 Oct 27;12:752760. doi: 10.3389/fmicb.2021.752760 (PMC8579042; doi:10.3389/fmicb.2021.752760)
Supplement: Supplementary file 1 [file Table_1.XLSX]

## Sheet: fastANI_out2
Table S6. ANI values of the Xanthomonas genomes (%)
	X. arboricola pv. juglandis CFBP 2528	X. arboricola pv. guizotiae CFBP 7408	X. arboricola CFBP 7645	X. arboricola CFBP 7653	X. arboricola NL_P126	X. arboricola pv. populi CFBP3123	Xanthomonas sp. Leaf131	X. populi CFBP1817	X. hortorum pv. hederae CFBP4925	X. hortorum pv. cynarae CFBP4188	X. fragariae PD885	X. citri LMG21719	X. phaseoli pv. phaseoli ISO18C2	X. perforans CFBP 7293	TC2-1	X. axonopodis DSM 3585	X. prunicola CFBP 8353	X. oryzae pv. oryzae ICMP3125	X. vasicola NCPPB 2417	X. bromi LMG947	X. nasturtii WHRI 8853	Xanthomonas sp. Leaf148	X. dyei CFBP7245	X. pisi CFBP4643	X. vesicatoria ATCC 35937	X. cucurbitae CFBP2542	X. melonis CFBP4644	X. codiaei CFBP4690	X. cassavae CFBP 464	X. floridensis WHRI 8848	X. cannabis pv. cannabis NCPPB 2877	X. campestris pv. campestris ATCC 33913	X. maliensis M97	Xanthomonas sp. NCPPB 1128	X. sacchari CFBP4641	X. sacchari R1	Xanthomonas sp. GPE 39	X. albilineans CFBP2523	X. translucens pv. translucens DSM 18974	X. hyacinthi CFBP1156	X. theicola CFBP 4691
X. arboricola pv. juglandis CFBP 2528	100	94.6059	94.6849	93.4457	92.6207	93.8494	89.9097	88.7698	90.12	90.1708	86.664	87.4808	87.2812	87.5124	87.3304	87.033	87.5459	86.5916	86.9048	87.2569	88.2933	87.4203	87.6315	88.5178	87.4174	86.8792	86.8922	87.5929	88.1368	87.7334	88.1754	87.078	83.4362	82.8451	83.0004	82.8523	80.0571	80.2699	83.0421	83.1606	82.7497
X. arboricola pv. guizotiae CFBP 7408	94.6011	100	93.5647	92.7346	92.2253	93.1499	89.4824	88.4015	89.7045	89.787	86.558	88.0123	87.7611	88.0097	87.6967	87.3623	87.915	87.0128	87.3417	87.4673	88.5976	87.5643	87.6524	88.5035	87.3869	87.1805	87.0437	87.9267	88.3254	87.8858	88.2292	86.9834	83.7042	82.9746	82.9772	82.9177	80.0933	80.2194	82.9483	83.0959	82.5896
X. arboricola CFBP 7645	94.7466	93.5566	100	92.9796	92.3201	93.4427	89.8017	88.6126	89.8476	89.7951	86.6445	87.2831	87.2286	87.304	87.1112	86.8297	87.3666	86.517	86.8706	87.0436	88.1121	87.2954	87.4449	88.2141	87.1999	86.7466	86.6197	87.4761	87.7265	87.5606	87.9063	86.7799	83.5729	82.6605	82.6983	82.5542	80.0838	80.3107	82.7425	82.879	82.4613
X. arboricola CFBP 7653	93.4604	92.705	92.9579	100	94.4099	93.8548	89.7329	88.6162	90.0475	89.921	86.6201	87.521	87.3717	87.448	87.1962	86.9916	87.3262	86.6809	86.8342	87.2994	88.3597	87.567	87.6976	88.3614	87.3936	87.1124	86.9244	87.8235	87.8493	87.6221	88.0721	87.0958	83.7689	82.9568	82.8102	82.8057	80.1606	80.2666	83.0845	83.2578	82.6987
X. arboricola NL_P126	92.6881	92.2556	92.2383	94.4249	100	92.9926	89.5408	88.346	89.6429	89.6549	86.4467	87.3734	87.3614	87.4708	87.1511	87.0797	87.2673	86.5421	86.7767	87.187	88.3252	87.5612	87.6611	88.4849	87.4386	87.389	87.0371	87.9823	87.9032	87.8001	88.2183	87.004	83.8685	83.0779	83.054	83.0049	80.2328	80.3114	83.2339	83.5535	82.942
X. arboricola pv. populi CFBP3123	93.8522	93.1872	93.4768	93.8775	92.9482	100	90.0021	88.9852	90.1618	90.1891	86.7769	87.4672	87.3442	87.435	87.1767	86.9389	87.3719	86.7007	86.9578	87.2885	88.3473	87.4803	87.622	88.3224	87.3739	86.8872	86.9003	87.6268	87.8933	87.5899	88.0281	86.921	83.4818	82.6763	82.8219	82.7644	80.1052	80.1202	82.8826	82.9066	82.5424
Xanthomonas sp. Leaf131	89.985	89.5424	89.7407	89.7109	89.3799	89.9638	100	90.4057	92.567	92.7246	86.6166	86.9924	86.7878	86.9353	86.6857	86.52	86.8267	86.2601	86.5554	86.7751	88.0073	87.3104	87.3443	87.6499	86.7844	86.2311	86.0689	86.7417	86.8516	86.886	87.3266	86.6272	82.9473	81.9169	81.9285	81.8576	79.6458	79.8379	82.1385	82.1544	81.7896
X. populi CFBP1817	88.7309	88.399	88.6335	88.6117	88.402	88.9825	90.5671	100	90.8764	90.9794	86.3888	86.0253	85.9894	86.1737	86.0467	85.8916	86.1001	85.5284	85.9018	86.14	87.0079	86.3803	86.3443	86.5538	86.0345	85.2338	85.1652	86.0951	86.0146	86.0778	86.2694	85.6975	82.4116	81.3917	81.3645	81.3677	79.6974	79.417	81.6138	81.4279	81.2689
X. hortorum pv. hederae CFBP4925	90.2078	89.7186	89.8419	89.9232	89.6624	90.0975	92.6119	90.7857	100	96.091	86.8628	87.2185	86.9324	87.1172	86.8779	86.5818	87.0395	86.3866	86.8064	87.0229	88.1287	87.4622	87.6147	87.765	87.0504	86.2803	86.1406	86.8762	87.0003	87.0853	87.3863	86.9123	82.9911	81.9207	82.0039	82.0419	79.611	80.0875	82.2853	82.2503	81.7115
X. hortorum pv. cynarae CFBP4188	90.123	89.8133	89.8407	89.8803	89.593	90.1279	92.6859	90.7537	96.1236	100	86.6898	87.0238	86.9698	87.0253	86.9013	86.5564	87.1035	86.2525	86.8295	86.9958	88.2541	87.4069	87.5253	87.745	87.0169	86.2491	86.1245	86.81	86.9523	87.1008	87.4409	86.8849	82.9736	81.9961	81.9881	81.9225	79.7626	79.924	82.1601	82.3365	81.8666
X. fragariae PD885	86.8703	86.6621	86.5382	86.7005	86.4911	86.9109	86.8341	86.5211	87.1596	86.937	100	85.8073	85.6235	85.5643	85.4359	85.2898	85.6068	85.4453	85.6362	85.6171	86.372	85.5107	85.5792	85.559	85.2246	84.4667	84.4121	85.0349	85.2443	85.1335	85.6913	85.0637	81.6332	80.8384	80.8921	80.9608	79.2106	79.2087	80.8608	80.9996	80.7253
X. citri LMG21719	87.4337	87.985	87.1851	87.3519	87.3001	87.3697	86.9724	85.9011	87.2571	86.9828	85.5096	100	93.739	94.5591	94.1698	93.1411	90.1376	89.5815	90.3285	89.5357	89.1811	86.6484	86.662	87.0112	86.4728	86.1024	86.1914	86.8164	87.089	86.9025	87.2924	85.8374	83.0326	81.6776	81.7765	81.7159	79.6932	79.7168	82.0629	81.8866	81.511
X. phaseoli pv. phaseoli ISO18C2	87.5051	87.7032	87.1236	87.265	87.2923	87.3275	86.7742	85.8981	86.7707	86.8808	85.3884	93.6115	100	94.1055	94.0102	93.4399	89.7093	89.3318	89.6633	89.3929	89.0364	86.6683	86.6499	87.0466	86.753	86.2875	86.3691	87.1273	87.2155	87.0365	87.4704	85.8238	83.4098	81.9234	82.1008	81.8894	79.7677	79.8762	81.9798	82.0632	81.6503
X. perforans CFBP 7293	87.4249	87.9158	87.2382	87.4761	87.4121	87.4287	86.9856	86.0893	87.0773	86.9757	85.3973	94.5086	94.1455	100	97.7759	93.4092	90.1012	89.8373	90.3299	89.5124	89.1636	86.7117	86.7192	87.1117	86.662	86.3682	86.3808	87.0476	87.415	86.997	87.5492	85.9281	83.4109	81.9944	82.2006	82.1619	79.732	79.9159	82.2122	82.1625	81.6986
TC2-1	87.2554	87.6848	86.9684	87.113	87.1171	87.1772	86.7906	85.7429	86.9165	86.9501	85.2318	94.1695	93.9012	97.7149	100	93.0389	89.9068	89.69	90.1397	89.3155	88.8929	86.5045	86.5681	86.7392	86.5362	86.0846	86.1826	86.9632	87.2804	86.9083	87.4878	85.8233	83.2417	81.7744	82.0387	82.0109	79.6132	79.7247	81.9621	81.9086	81.6831
X. axonopodis DSM 3585	87.012	87.4011	86.8349	87.0466	87.0608	87.0124	86.6528	85.7515	86.5846	86.5803	85.1237	93.2178	93.5501	93.447	93.0535	100	89.7829	89.4227	89.7617	89.6059	88.8608	86.3085	86.491	86.6666	86.2632	85.9005	85.8555	86.4905	86.6534	86.4742	87.2152	85.4437	82.845	81.6473	81.7978	81.5849	79.5847	79.6973	81.8023	81.7673	81.4797
X. prunicola CFBP 8353	87.4888	87.8841	87.2162	87.3045	87.1567	87.3503	86.7825	86.0057	86.9829	86.9656	85.3521	90.1016	89.6966	90.1183	89.7422	89.6694	100	90.762	91.1994	89.8228	89.0844	87.0722	87.1678	88.5268	86.8569	85.9525	85.7786	86.6933	86.7907	87.1427	87.1968	85.566	82.8678	81.4799	81.5399	81.521	79.5144	79.7502	81.9282	81.663	81.5259
X. oryzae pv. oryzae ICMP3125	86.6494	87.0268	86.4029	86.5671	86.4236	86.6696	86.3419	85.5832	86.3261	86.3599	85.3791	89.6943	89.2531	89.8073	89.5884	89.4427	90.8977	100	90.8635	89.3173	88.5066	86.0983	86.1238	86.2686	85.8628	85.4929	85.4415	85.9785	86.4867	86.0759	86.7161	85.1727	82.6359	81.3827	81.5356	81.4861	79.7343	79.8284	81.5647	81.3631	81.2042
X. vasicola NCPPB 2417	86.8355	87.3138	86.7256	86.8681	86.7907	86.9311	86.6969	85.8384	86.8596	86.71	85.208	90.2827	89.7737	90.3309	89.9482	89.7304	91.2587	90.8704	100	89.5463	88.9765	86.3556	86.3652	86.5495	86.1898	85.5616	85.5216	86.2338	86.4292	86.2466	87.0616	85.5178	82.6399	81.0551	81.054	81.2032	79.5336	79.5706	81.549	81.4094	80.9152
X. bromi LMG947	87.1249	87.4162	87.1054	87.2654	87.1642	87.2502	86.8872	86.1623	87.031	86.9191	85.4275	89.5458	89.354	89.577	89.2636	89.5899	89.9088	89.2301	89.6136	100	89.1163	87.0744	87.2727	87.3179	87.2478	86.432	85.9073	86.9456	87.1637	87.1174	87.2764	85.6782	82.8139	81.7344	81.7018	81.6081	79.6866	79.9328	81.8208	81.8934	81.439
X. nasturtii WHRI 8853	88.3245	88.5852	88.1141	88.3753	88.3408	88.259	88.0595	86.9037	88.1654	88.1575	86.24	89.1401	88.9993	89.2732	88.9745	88.7337	88.992	88.4285	88.9672	89.0499	100	87.7478	87.8059	88.132	87.9027	86.8084	86.5748	87.5657	87.42	87.4252	89.388	86.5075	83.0265	81.9685	82.0735	82.0249	79.7513	79.8481	82.2167	82.2879	81.8144
Xanthomonas sp. Leaf148	87.3953	87.523	87.1758	87.4159	87.3572	87.3215	87.2301	86.3348	87.3473	87.2499	85.4621	86.6553	86.6014	86.6119	86.4365	86.3364	87.1419	85.9905	86.242	86.9594	87.8529	100	94.7571	91.3485	90.6988	86.7752	86.2629	87.3978	87.4324	88.4509	87.9194	86.2144	82.7276	81.6027	81.7155	81.6233	79.5504	79.6293	81.7679	81.8661	81.3945
X. dyei CFBP7245	87.5479	87.6511	87.4294	87.5602	87.6091	87.5267	87.3641	86.2407	87.503	87.3971	85.4291	86.6445	86.6618	86.7942	86.4553	86.4312	87.1913	85.9915	86.3398	87.1659	87.8982	94.8203	100	91.7444	91.1405	86.863	86.5155	87.6142	87.6627	88.5542	88.0906	86.3635	82.9217	81.7221	81.8557	81.9554	79.6366	79.7041	82.1074	82.0423	81.5039
X. pisi CFBP4643	88.4469	88.4628	88.1408	88.2263	88.4456	88.2255	87.6326	86.4883	87.7035	87.6583	85.3828	87.0044	86.9342	87.0913	86.7983	86.6814	88.497	86.1993	86.422	87.2192	88.0744	91.2873	91.7144	100	90.6857	87.0797	86.9183	87.8297	87.9387	89.8488	88.1583	86.4401	83.0852	82.1238	82.1716	82.1889	79.7963	80.0003	82.5629	82.3712	81.9704
X. vesicatoria ATCC 35937	87.2945	87.4073	87.069	87.2859	87.4189	87.1905	86.713	85.834	86.9401	86.9284	85.0658	86.4678	86.66	86.7305	86.433	86.2689	86.9093	85.9122	86.1083	87.2061	87.8881	90.6573	91.0204	90.6778	100	86.9517	86.368	87.7121	87.6699	88.5399	87.8696	86.0099	82.6408	81.7057	81.6919	81.802	79.4873	79.7823	81.8401	81.895	81.4378
X. cucurbitae CFBP2542	86.9915	87.2746	86.8733	87.2017	87.3791	86.8797	86.2775	85.2861	86.3234	86.4747	84.609	86.0638	86.4546	86.4942	86.3051	85.9708	85.9965	85.4773	85.8063	86.5856	86.9388	86.946	86.9692	87.2355	86.9301	100	88.2666	90.0026	89.8138	89.9655	87.6385	85.9594	83.2134	82.3929	82.4994	82.3907	79.844	80.0497	82.5984	82.7048	82.2835
X. melonis CFBP4644	86.8173	87.0888	86.6575	86.9812	87.0385	86.9027	86.0756	85.1039	86.1465	86.1771	84.2346	86.2554	86.3104	86.3031	86.0791	85.8399	85.9368	85.4098	85.4444	86.0459	86.7139	86.4473	86.571	87.0317	86.372	88.2371	100	88.7693	88.2898	88.1945	87.0763	85.7179	83.4315	82.5866	82.4473	82.5019	79.9736	80.0466	82.4697	82.6857	82.3355
X. codiaei CFBP4690	87.5663	87.887	87.4227	87.6546	87.9043	87.5424	86.7498	85.8518	86.8645	86.8601	84.9606	86.8449	87.1052	87.0138	86.8141	86.5724	86.7277	86.0186	86.22	87.05	87.5303	87.4484	87.6345	87.882	87.7171	89.8815	88.6417	100	91.9201	92.1244	88.3449	86.3855	83.5455	82.6694	82.6791	82.6546	79.9953	80.3059	82.8453	82.9792	82.6245
X. cassavae CFBP 464	87.9704	88.154	87.7374	87.8113	87.8695	87.6677	86.8412	85.9689	86.829	87.0085	84.942	87.1104	87.1374	87.3633	87.1009	86.7	86.7746	86.1756	86.4467	87.0588	87.4947	87.4066	87.5705	87.8767	87.6922	89.731	88.241	91.8775	100	93.3008	88.102	86.27	83.374	82.2967	82.3193	82.3687	79.8459	80.0769	82.4314	82.6285	82.0978
X. floridensis WHRI 8848	87.6312	87.8076	87.4739	87.5174	87.8358	87.4676	86.9108	86.0832	86.9675	86.988	84.9581	86.8294	87.0148	87.0404	86.7355	86.5059	87.0264	85.98	86.2139	87.0371	87.5692	88.3509	88.5907	89.7809	88.4484	89.7854	88.1212	92.0125	93.3044	100	88.214	86.3992	83.2975	82.2353	82.3158	82.2766	79.8297	80.0716	82.4889	82.6319	82.0143
X. cannabis pv. cannabis NCPPB 2877	88.1742	88.3116	87.9005	88.172	88.3442	88.0534	87.2672	86.2062	87.4741	87.393	85.388	87.4807	87.5647	87.6077	87.4035	87.3293	87.2631	86.6081	87.0539	87.2687	89.345	88.0373	88.0105	88.3324	87.8665	87.4736	87.0744	88.4236	88.2943	88.2125	100	86.4567	83.2053	82.2533	82.2592	82.2093	79.7754	79.7904	82.2665	82.4842	81.9253
X. campestris pv. campestris ATCC 33913	86.9296	86.9428	86.7655	87.0313	86.9355	86.8383	86.499	85.6003	86.8629	86.7865	84.6679	85.7408	85.8945	85.8074	85.5694	85.4622	85.6204	85.1062	85.3206	85.6624	86.3883	86.1903	86.291	86.4931	86.0764	85.6862	85.6287	86.3371	86.2151	86.4214	86.3853	100	83.1202	82.2187	82.173	82.0329	79.581	79.8174	82.2306	82.2171	81.9262
X. maliensis M97	83.6923	83.7098	83.6103	83.9318	83.9623	83.5841	82.9949	82.2957	83.1543	82.9704	81.6289	83.2057	83.3866	83.5537	83.2328	82.9062	82.9402	82.6925	82.673	82.8656	83.053	82.831	82.9369	83.2714	82.7112	83.2733	83.528	83.7182	83.4391	83.4269	83.4011	83.1354	100	81.6643	81.7456	81.7231	79.2259	79.5021	81.3408	81.6742	81.3439
Xanthomonas sp. NCPPB 1128	82.7099	82.7426	82.7024	82.6736	83.0084	82.5477	81.8665	81.2897	81.8518	82.0662	80.792	81.6452	81.8357	81.8144	81.7282	81.4296	81.5872	81.3482	81.1476	81.6635	81.9292	81.5775	81.663	82.1921	81.6527	82.2764	82.3643	82.6825	82.3395	82.3449	82.1685	82.1128	81.6355	100	93.7973	93.9331	83.6316	84.2687	88.2558	88.536	88.1908
X. sacchari CFBP4641	82.9231	82.9112	82.7061	82.8349	83.1866	82.7009	81.9614	81.3403	82.0233	82.1326	80.8844	82.0039	82.0788	82.1383	82.0438	81.6832	81.5213	81.4421	81.2721	81.6674	82.0353	81.6617	81.7477	82.2232	81.7443	82.4868	82.5783	82.7827	82.4629	82.3462	82.4614	82.1935	81.8532	93.8268	100	94.3917	83.7305	84.2057	88.3673	88.7649	88.2096
X. sacchari R1	82.7589	82.9125	82.6281	82.7805	82.9513	82.5623	81.7602	81.361	81.9942	81.9941	80.8868	81.7623	82.0231	82.0569	81.774	81.5868	81.4969	81.4527	81.2506	81.5706	81.9369	81.5666	81.7373	82.238	81.7088	82.3431	82.6091	82.7303	82.5697	82.3178	82.2633	82.127	81.6578	94.0073	94.4097	100	83.6462	84.3187	88.1744	88.6467	87.9383
Xanthomonas sp. GPE 39	80.133	80.1127	80.254	80.3233	80.2365	80.1217	79.8395	79.6253	79.8766	79.9218	79.1816	79.6797	79.9003	79.6786	79.7486	79.5417	79.6105	79.6765	79.5263	79.9504	79.84	79.7517	79.7814	79.9441	79.7078	80.0506	79.9756	79.9884	79.9975	79.9405	79.7758	79.7947	79.316	83.8557	83.8467	83.8641	100	90.5901	83.094	83.3328	82.9896
X. albilineans CFBP2523	80.2927	80.3346	80.3476	80.3296	80.4311	80.2816	79.852	79.5323	79.9458	79.9613	79.2635	79.7484	79.8362	79.8455	79.8659	79.7598	79.6806	79.7183	79.6659	79.9274	79.8345	79.7144	79.7373	80.0835	79.6965	80.0459	80.2934	80.2731	80.173	80.0141	79.9735	79.909	79.4508	84.4922	84.4123	84.4627	90.5165	100	83.6531	83.812	83.477
X. translucens pv. translucens DSM 18974	82.9552	82.9563	82.7198	83.075	83.2546	82.9009	81.9942	81.7249	82.3063	82.1139	80.9847	82.1022	82.1126	82.2086	81.9939	81.9019	81.8139	81.5203	81.5885	81.8796	82.275	81.781	81.955	82.4571	81.8571	82.4845	82.5703	83.0187	82.5668	82.5199	82.4193	82.4736	81.3854	88.3937	88.4477	88.2329	83.013	83.5495	100	92.447	89.9744
X. hyacinthi CFBP1156	82.9059	83.1125	82.9216	83.1907	83.4891	82.8446	82.1054	81.5211	82.1362	82.2135	80.915	81.9153	81.9734	82.0204	81.9972	81.8288	81.6777	81.3936	81.4676	81.8878	82.1105	81.8213	81.9238	82.4207	82.0166	82.6066	82.6974	82.8787	82.5434	82.5538	82.5176	82.3088	81.5657	88.7932	88.8197	88.6897	83.181	83.6985	92.2776	100	90.7902
X. theicola CFBP 4691	82.6143	82.7087	82.4627	82.6754	82.8673	82.4669	81.6499	81.1983	81.7315	81.8761	80.6984	81.6586	81.7399	81.7665	81.5541	81.6093	81.4039	81.0509	81.0346	81.5732	81.6103	81.2733	81.4525	81.9754	81.3318	82.2481	82.2317	82.4251	82.1488	81.9201	82.1916	81.8075	81.1905	87.9857	88.1098	87.9554	82.7978	83.4234	89.9494	90.9932	100
