# Supplementary material for: Microbial Diversity Analysis and Genome Sequencing Identify Xanthomonas perforans as the Pathogen of Bacterial Leaf Canker of Water Spinach (Ipomoea aquatic)
Source: Front Microbiol. 2021 Oct 27;12:752760. doi: 10.3389/fmicb.2021.752760 (PMC8579042; doi:10.3389/fmicb.2021.752760)
Supplement: Supplementary file 2 [file Table_2.XLSX]

## Sheet: Table S7
Table S7. The unique genes in the TC2-1 genome compared with other X. perforans genomes
Gene No.	Function	Predicted category
TC2-1_000064	IS5-like element ISXca5 family transposase	transposase
TC2-1_000073	hypothetical protein
TC2-1_000093	IS5-like element ISXca5 family transposase	transposase
TC2-1_000097	DUF2164 domain-containing protein
TC2-1_000122	hypothetical protein
TC2-1_000123	hypothetical protein
TC2-1_000129	hypothetical protein
TC2-1_000218	IS5-like element ISXca5 family transposase	transposase
TC2-1_000237	hypothetical protein
TC2-1_000257	IS481 family transposase	transposase, T6SE
TC2-1_000267	IS5-like element ISXca5 family transposase	transposase
TC2-1_000272	IS5-like element ISXca5 family transposase	transposase
TC2-1_000288	hypothetical protein
TC2-1_000311	IS5-like element ISXca5 family transposase	transposase
TC2-1_000348	hypothetical protein
TC2-1_000352	IS5-like element ISXca5 family transposase	transposase
TC2-1_000400	IS5-like element ISXca5 family transposase	transposase
TC2-1_000480	hypothetical protein
TC2-1_000484	IS481 family transposase	transposase, T6SE
TC2-1_000548	hypothetical protein
TC2-1_000549	hypothetical protein
TC2-1_000550	IS5-like element ISXca5 family transposase	transposase
TC2-1_000551	IS5-like element ISXca5 family transposase	transposase
TC2-1_000556	IS481 family transposase	transposase
TC2-1_000570	hypothetical protein
TC2-1_000584	hypothetical protein
TC2-1_000585	IS5-like element ISXca5 family transposase	transposase
TC2-1_000643	IS481 family transposase	transposase, T6SE
TC2-1_000649	hypothetical protein	island
TC2-1_000651	hypothetical protein	island
TC2-1_000652	ATP-binding protein	island
TC2-1_000653	HNH endonuclease	island
TC2-1_000654	hypothetical protein	island
TC2-1_000655	TniQ family protein	island
TC2-1_000656	AAA family ATPase	island
TC2-1_000720	IS5-like element ISXca5 family transposase	transposase
TC2-1_000744	IS5-like element ISXca5 family transposase	transposase
TC2-1_000799	IS481 family transposase	transposase, T6SE
TC2-1_000901	IS5-like element ISXca5 family transposase	transposase
TC2-1_001020	hypothetical protein
TC2-1_001075	IS481 family transposase	transposase, T6SE
TC2-1_001142	hypothetical protein
TC2-1_001150	IS5-like element ISXca5 family transposase	transposase
TC2-1_001156	IS5-like element ISXca5 family transposase	transposase
TC2-1_001161	hypothetical protein
TC2-1_001163	IS5-like element ISXca5 family transposase	transposase
TC2-1_001164	IS5-like element ISXca5 family transposase	transposase
TC2-1_001166	IS5-like element ISXca5 family transposase	transposase
TC2-1_001176	IS5-like element ISXca5 family transposase	transposase
TC2-1_001197	IS5-like element ISXca5 family transposase	transposase
TC2-1_001217	IS5 family transposase	transposase
TC2-1_001223	hypothetical protein
TC2-1_001333	hypothetical protein
TC2-1_001337	avirulence protein	T3SE
TC2-1_001432	IS5-like element ISXca5 family transposase	transposase
TC2-1_001436	IS5-like element ISXca5 family transposase	transposase
TC2-1_001502	IS5-like element ISXca5 family transposase	transposase, island
TC2-1_001519	IS5-like element ISXca5 family transposase	transposase
TC2-1_001586	IS5-like element ISXca5 family transposase	transposase
TC2-1_001597	IS5-like element ISXca5 family transposase	transposase
TC2-1_001599	hypothetical protein
TC2-1_001623	hypothetical protein	phaster
TC2-1_001657	hypothetical protein
TC2-1_001688	IS5-like element ISXca5 family transposase	transposase
TC2-1_001780	IS481 family transposase	transposase, T6SE
TC2-1_001785	hypothetical protein
TC2-1_001786	IS5-like element ISXca5 family transposase	transposase
TC2-1_001832	hypothetical protein	island
TC2-1_001833	hypothetical protein	island
TC2-1_001834	TatD family hydrolase	island
TC2-1_001836	hypothetical protein	island
TC2-1_001862	IS5-like element ISXca5 family transposase	transposase, island
TC2-1_001866	phosphatidylserine/phosphatidylglycerophosphate/cardiolipin synthase family protein	island
TC2-1_001880	hypothetical protein	island
TC2-1_001881	hypothetical protein	island
TC2-1_001887	IS5 family transposase	transposase
TC2-1_001897	hypothetical protein
TC2-1_001910	IS5-like element ISXca5 family transposase	transposase
TC2-1_002018	IS5-like element ISXca5 family transposase	transposase
TC2-1_002093	IS5-like element ISXca5 family transposase	transposase
TC2-1_002134	IS5-like element ISXca5 family transposase	transposase
TC2-1_002160	hypothetical protein
TC2-1_002182	hypothetical protein
TC2-1_002230	hypothetical protein
TC2-1_002304	GIY-YIG nuclease family protein	island
TC2-1_002307	helix-turn-helix domain-containing protein	island
TC2-1_002308	XRE family transcriptional regulator	island
TC2-1_002314	type II toxin-antitoxin system VapC family toxin
TC2-1_002315	plasmid stabilization protein
TC2-1_002376	IS5-like element ISXca5 family transposase	transposase
TC2-1_002408	hypothetical protein
TC2-1_002460	hypothetical protein	island
TC2-1_002532	TIGR04255 family protein	island
TC2-1_002533	hypothetical protein	island
TC2-1_002534	hypothetical protein	island
TC2-1_002535	LacI family transcriptional regulator	island
TC2-1_002537	DUF2924 domain-containing protein	island
TC2-1_002538	hypothetical protein	island
TC2-1_002539	hypothetical protein	island
TC2-1_002541	helix-turn-helix transcriptional regulator	island
TC2-1_002542	hypothetical protein	island
TC2-1_002543	hypothetical protein	island
TC2-1_002544	DNA-binding protein	island
TC2-1_002545	hypothetical protein	island
TC2-1_002546	hypothetical protein	island
TC2-1_002547	ATP-binding protein	island
TC2-1_002548	hypothetical protein	island
TC2-1_002550	hypothetical protein	island
TC2-1_002551	hypothetical protein	island
TC2-1_002552	AAA family ATPase	island
TC2-1_002553	hypothetical protein	island
TC2-1_002554	hypothetical protein	island
TC2-1_002555	helix-turn-helix domain-containing protein	island
TC2-1_002558	hypothetical protein	island, phaster
TC2-1_002559	DUF3489 domain-containing protein	island, phaster
TC2-1_002560	hypothetical protein	island, phaster
TC2-1_002561	elements of external origin	island, phaster
TC2-1_002562	phage terminase large subunit family protein	island, phaster
TC2-1_002563	hypothetical protein	island, phaster
TC2-1_002564	hypothetical protein	island, phaster
TC2-1_002565	hypothetical protein	island, phaster
TC2-1_002567	head decoration protein	island, phaster
TC2-1_002568	major capsid protein	island, phaster
TC2-1_002569	hypothetical protein	island, phaster
TC2-1_002570	hypothetical protein	island, phaster
TC2-1_002571	hypothetical protein	island, phaster
TC2-1_002572	hypothetical protein	island, phaster
TC2-1_002573	hypothetical protein	island, phaster
TC2-1_002574	hypothetical protein	island, phaster
TC2-1_002575	hypothetical protein	island, phaster
TC2-1_002576	phage tail protein	island, phaster
TC2-1_002577	hypothetical protein	island, phaster
TC2-1_002578	hypothetical protein	island, phaster
TC2-1_002579	hypothetical protein	island, phaster
TC2-1_002580	phage BR0599 family protein	island, phaster
TC2-1_002581	hypothetical protein	island, phaster
TC2-1_002582	hypothetical protein	island, phaster
TC2-1_002583	phage tail protein	island, phaster
TC2-1_002584	DUF2793 domain-containing protein	island, phaster
TC2-1_002585	hypothetical protein	island, phaster
TC2-1_002586	hypothetical protein	island, phaster
TC2-1_002587	lysozyme	island, phaster
TC2-1_002588	hypothetical protein	island
TC2-1_002589	hypothetical protein	island
TC2-1_002590	BREX-3 system phosphatase PglZ	island
TC2-1_002592	hypothetical protein	island
TC2-1_002593	hypothetical protein	island
TC2-1_002594	BREX-3 system P-loop-containing protein BrxF	island
TC2-1_002595	WYL domain-containing protein	island
TC2-1_002596	ADP-ribosylglycohydrolase family protein	island
TC2-1_002597	hypothetical protein	island
TC2-1_002598	DCL family protein	island
TC2-1_002599	DNA-binding protein	island
TC2-1_002600	helix-turn-helix domain-containing protein	island
TC2-1_002601	PIN domain-containing protein	island
TC2-1_002603	IS481 family transposase	transposase, island,T6SE
TC2-1_002630	IS5-like element ISXca5 family transposase	transposase
TC2-1_002638	IS481 family transposase	transposase, T6SE
TC2-1_002718	IS481 family transposase	transposase, T6SE
TC2-1_002759	IS5-like element ISXca5 family transposase	transposase
TC2-1_002916	hypothetical protein
TC2-1_002936	IS481 family transposase	transposase, T6SE
TC2-1_002966	winged helix-turn-helix transcriptional regulator
TC2-1_003035	Hrp-dependent type III effector protein	T3SE
TC2-1_003087	IS5-like element ISXca5 family transposase	transposase
TC2-1_003159	IS5-like element ISXca5 family transposase	transposase
TC2-1_003180	IS5-like element ISXca5 family transposase	transposase
TC2-1_003217	IS5 family transposase	transposase, island
TC2-1_003237	IS5-like element ISXca5 family transposase	transposase
TC2-1_003297	hypothetical protein
TC2-1_003342	IS5-like element ISXca5 family transposase	transposase
TC2-1_003346	IS5-like element ISXca5 family transposase	transposase
TC2-1_003362	IS5-like element ISXca5 family transposase	transposase, island
TC2-1_003364	DUF3742 family protein	island
TC2-1_003365	TatD family hydrolase	island
TC2-1_003366	hypothetical protein	island
TC2-1_003367	hypothetical protein	island
TC2-1_003368	NTPase KAP	island
TC2-1_003369	poly-gamma-glutamate hydrolase family protein	island
TC2-1_003370	type IV toxin-antitoxin system AbiEi family antitoxin	island
TC2-1_003371	nucleotidyl transferase AbiEii/AbiGii toxin family protein	island
TC2-1_003376	hypothetical protein	island
TC2-1_003377	hypothetical protein	island
TC2-1_003378	hypothetical protein	island
TC2-1_003380	MobA/MobL family protein	island
TC2-1_003381	hypothetical protein	island
TC2-1_003382	S-adenosylmethionine-binding protein	island
TC2-1_003385	IS5-like element ISXca5 family transposase	transposase, island
TC2-1_003386	hypothetical protein	island
TC2-1_003388	hypothetical protein	island
TC2-1_003409	IS5-like element ISXca5 family transposase	transposase
TC2-1_003456	IS5-like element ISXca5 family transposase	transposase
TC2-1_003463	IS5-like element ISXca5 family transposase	transposase
TC2-1_003481	IS5-like element ISXca5 family transposase	transposase
TC2-1_003534	IS5-like element ISXca5 family transposase	transposase
TC2-1_003558	hypothetical protein
TC2-1_003637	IS5-like element ISXca5 family transposase	transposase
TC2-1_003654	IS5-like element ISXca5 family transposase	transposase
TC2-1_003665	AAA family ATPase
TC2-1_003666	hypothetical protein
TC2-1_003668	IS5-like element ISXca5 family transposase	transposase
TC2-1_003672	IS5-like element ISXca5 family transposase	transposase
TC2-1_003839	hypothetical protein
TC2-1_003886	IS481 family transposase	transposase, phaster,T6SE
TC2-1_003892	IS481 family transposase	transposase, phaster,T6SE
TC2-1_003893	IS5-like element ISXca5 family transposase	transposase, phaster
TC2-1_003906	IS5-like element ISXca5 family transposase	transposase
TC2-1_003927	IS5-like element ISXca5 family transposase	transposase, phaster
TC2-1_003939	IS5-like element ISXca5 family transposase	transposase
TC2-1_003943	IS481 family transposase	transposase, T6SE
TC2-1_003951	IS5-like element ISXca5 family transposase	transposase
TC2-1_003954	type III effector HopG1	T3SE
TC2-1_004027	IS481 family transposase	transposase, T6SE
TC2-1_004046	IS5-like element ISXca5 family transposase	transposase
TC2-1_004103	hypothetical protein
TC2-1_004104	IS5-like element ISXca5 family transposase	transposase
TC2-1_004110	IS5-like element ISXca5 family transposase	transposase
TC2-1_004154	IS5-like element ISXca5 family transposase	transposase, phaster
TC2-1_004159	IS5-like element ISXca5 family transposase	transposase, phaster
TC2-1_004160	hypothetical protein	phaster
TC2-1_004163	IS481 family transposase	phaster,T6SE
TC2-1_004202	IS5-like element ISXca5 family transposase	transposase
TC2-1_004205	IS5-like element ISXca5 family transposase	transposase
TC2-1_004249	IS481 family transposase	transposase, T6SE
TC2-1_004257	IS5-like element ISXca5 family transposase	transposase
TC2-1_004282	hypothetical protein
TC2-1_004301	IS481 family transposase	transposase, T6SE
TC2-1_004312	IS5 family transposase	transposase
TC2-1_004318	IS5 family transposase	transposase
TC2-1_004356	hypothetical protein
TC2-1_004382	hypothetical protein
TC2-1_004389	IS5-like element ISXca5 family transposase	transposase
TC2-1_004398	hypothetical protein
TC2-1_004416	hypothetical protein
TC2-1_004421	hypothetical protein	island
TC2-1_004422	IS5-like element ISXca5 family transposase	transposase, island
TC2-1_004424	NYN domain-containing protein	island
TC2-1_004427	hypothetical protein	island, T3SE
TC2-1_004430	hypothetical protein	island, T3SE
TC2-1_004432	hypothetical protein	island, T3SE
TC2-1_004435	hypothetical protein	island, T3SE
TC2-1_004439	hypothetical protein	island, T3SE
TC2-1_004442	hypothetical protein	island, T3SE
TC2-1_004443	hypothetical protein	island
TC2-1_004445	hypothetical protein	island, T3SE
TC2-1_004447	hypothetical protein	island
TC2-1_004449	hypothetical protein	island, T3SE
TC2-1_004451	IS5-like element ISXca5 family transposase	transposase, island
TC2-1_004455	hypothetical protein	island, T3SE
TC2-1_004461	hypothetical protein	island, T3SE
TC2-1_004471	hypothetical protein	island, T3SE
TC2-1_004473	replication initiation protein	island
TC2-1_004481	hypothetical protein	island
TC2-1_004490	hypothetical protein	island, T3SE
TC2-1_004495	hypothetical protein	island, T3SE
TC2-1_004497	IS5-like element ISXca5 family transposase	transposase, island
TC2-1_004498	avirulence protein	island, T3SE
TC2-1_004501	hypothetical protein	island
TC2-1_004521	hypothetical protein	island, T3SE
TC2-1_004527	IS5-like element ISXca5 family transposase	transposase, island
TC2-1_004529	IS5-like element ISXca5 family transposase	transposase, island
TC2-1_004531	hypothetical protein	island
TC2-1_004538	hypothetical protein	island, T3SE
TC2-1_004544	hypothetical protein	island
TC2-1_004546	IS5-like element ISXca5 family transposase	transposase, island
TC2-1_004547	hypothetical protein	island, T3SE
TC2-1_004549	hypothetical protein	island
TC2-1_004552	IS5-like element ISXca5 family transposase	transposase
TC2-1_004555	TniB family NTP-binding protein
TC2-1_004560	IS5-like element ISXca5 family transposase	transposase
TC2-1_004562	hypothetical protein	island, T3SE
TC2-1_004564	hypothetical protein	island, T3SE
TC2-1_004566	hypothetical protein	island, T3SE
TC2-1_004580	hypothetical protein	island, T3SE
TC2-1_004589	hypothetical protein	island, T3SE
TC2-1_004594	IS5-like element ISXca5 family transposase	transposase, island
TC2-1_004608	IS5-like element ISXca5 family transposase	transposase, island
